# Supplementary material for: Superassembled MXene–carboxymethyl chitosan nanochannels for the highly sensitive recognition and detection of copper ions
Source: Royal Society of Chemistry journal article supplement (doi:10.1039/d3an02190d), 2024-01-01
Supplement: d3an02190d1.pdf [file d3an02190d1.pdf]

# Electronic supporting information

## Superassembled MXene-Carboxymethyl Chitosan Nanochannels for High-Sensitive Recognition and Detection of Copper Ions

Xiaomeng Hu,<sup>a</sup> Shan Zhou,<sup>b</sup> Xin Zhang,<sup>a</sup> Hui Zeng,<sup>a</sup> Yaxin Guo,<sup>a</sup> Yeqing Xu,<sup>a</sup> Qirui Liang,<sup>a,c</sup> Jinqiang Wang,<sup>d</sup> Lei Jiang,<sup>e</sup> and Biao Kong<sup>a,f,\*</sup>

<sup>a</sup>Department of Chemistry, Shanghai Key Lab of Molecular Catalysis and Innovative Materials and Collaborative Innovation Center of Chemistry for Energy Materials, Fudan University, Shanghai 200438, P. R. China.

<sup>b</sup>College of Materials Science and Engineering, Institute of Biomedical Materials and Engineering, Qingdao University, Qingdao 266071, P. R. China

<sup>c</sup>Qingdao Innovation and Development Center, Harbin Engineering University, Qingdao 266400, P. R. China

<sup>d</sup>Key Laboratory of Advanced Drug Delivery Systems of Zhejiang Province, College of Pharmaceutical Sciences, Zhejiang University, Hangzhou 310058, P. R. China

<sup>e</sup>CAS Key Laboratory of Bio-Inspired Materials and Interfacial Science, Technical Institute of Physics and Chemistry, Chinese Academy of Science, Beijing 100190, P. R. China

<sup>f</sup>Yiwu Research Institute of Fudan University, Yiwu, Zhejiang 322000, P. R. China

\*Corresponding author: Biao Kong (B.K.)

Email address: [bkong@fudan.edu.cn](mailto:bkong@fudan.edu.cn)

## Table of contents

|                                                                                                         |       |
|---------------------------------------------------------------------------------------------------------|-------|
| 1. Characterization of MXene/CMC and MXene nanosheets ....                                              | S3-S4 |
| 2. Ion transport performance of MXene/CMC .....                                                         | S5    |
| 3. Characterization of MXene/CMC with divalent metal ions .....                                         | S6    |
| 4. XPS spectrum of O 1s and N 1s of membranes .....                                                     | S7    |
| 5. Influence of CMC content on Cu <sup>2+</sup> detection .....                                         | S8-S9 |
| 6. I–V of MXene/CMC under different Cu <sup>2+</sup> concentrations .....                               | S10   |
| 7. Zeta potential and water contact angles of nanochannels .....                                        | S11   |
| 8. Detection of Cu <sup>2+</sup> in real samples .....                                                  | S12   |
| 9. The dosage of different MXene/CMC composite membrane ....                                            | S13   |
| 10. Comparison of some methods reported for Cu <sup>2+</sup> detection .....                            | S14   |
| 11. Results of the detection of Cu <sup>2+</sup> in tap water, drinking water, and<br>FBS samples ..... | S15   |
| 12. Supporting references .....                                                                         | S16   |

## 1. Characterization of MXene/CMC and MXene nanosheets

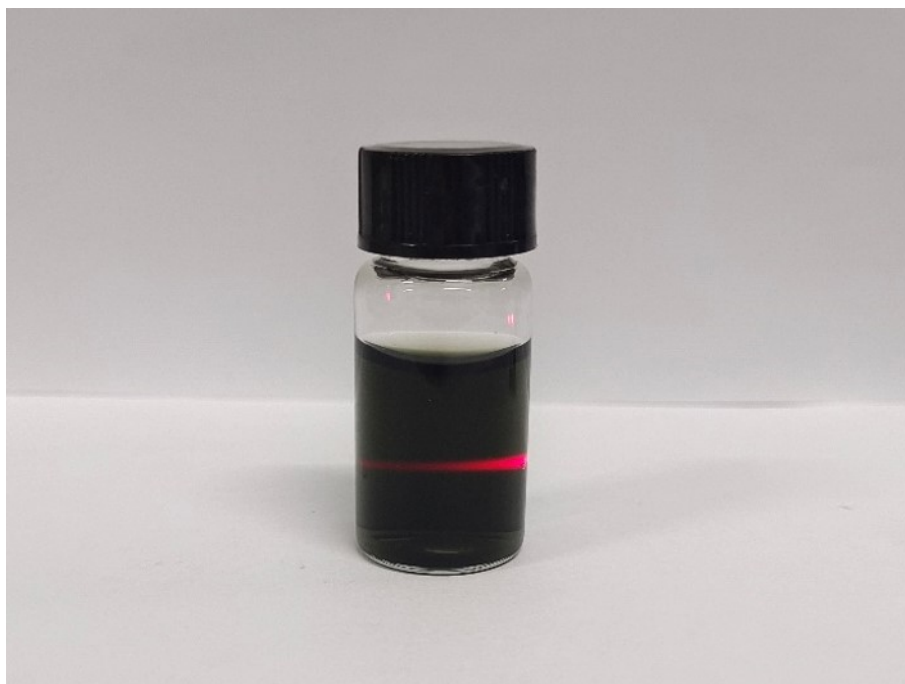

**Fig. S1** The Tyndall scattering effect<sup>1</sup> of the as-prepared MXene/CMC suspension, indicating the good dispersion in water.

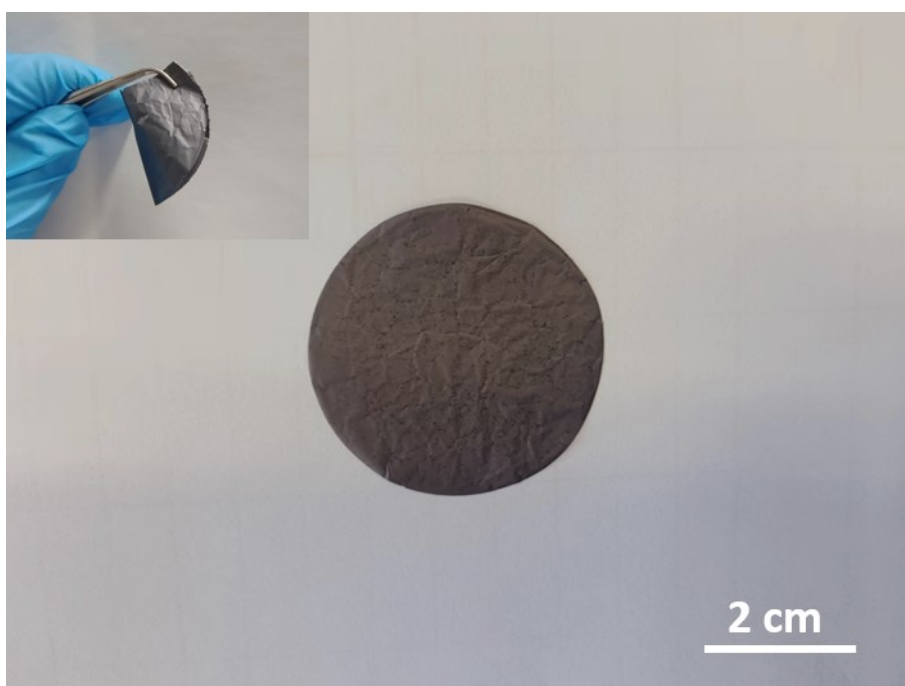

**Fig. S2** Photographs of the freestanding and flexible MXene/CMC membrane.

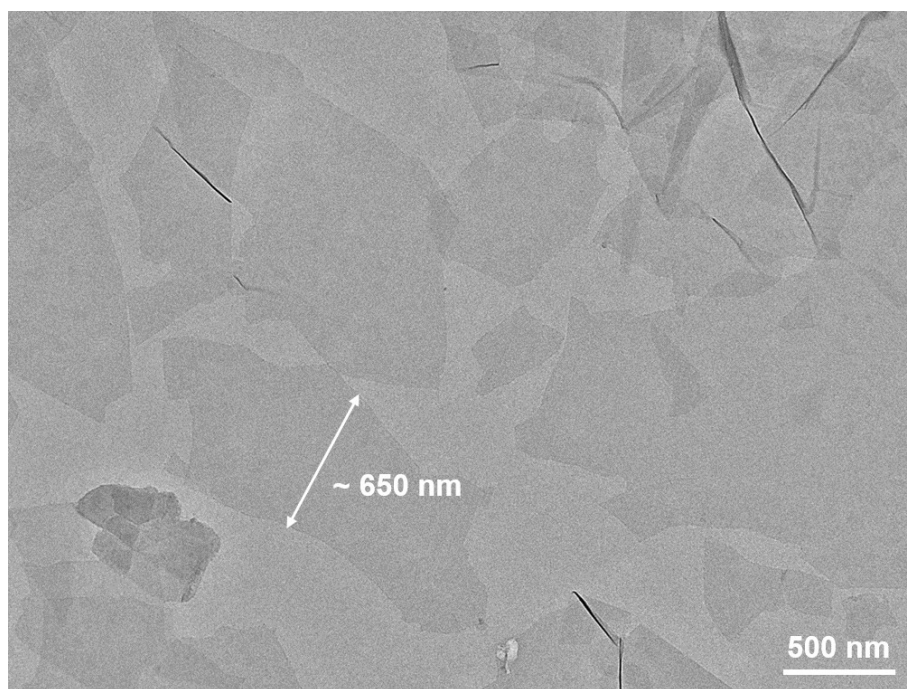

**Fig. S3** TEM image of thin MXene nanosheets.

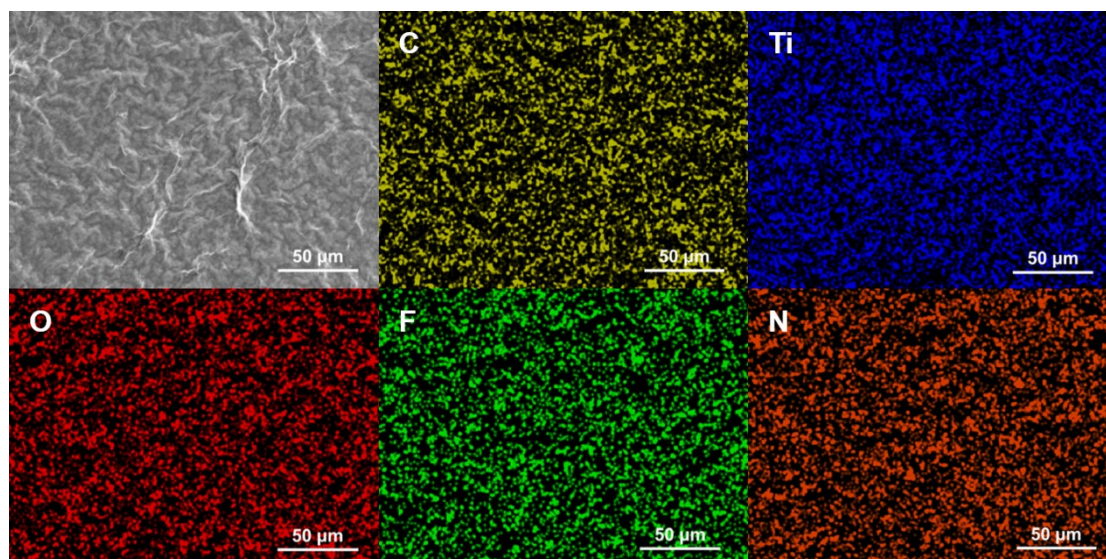

**Fig. S4** EDX mapping of the C, Ti, O, F and N distribution on the surface of the MXene/CMC membrane.

## 2. Ion transport performance of MXene/CMC

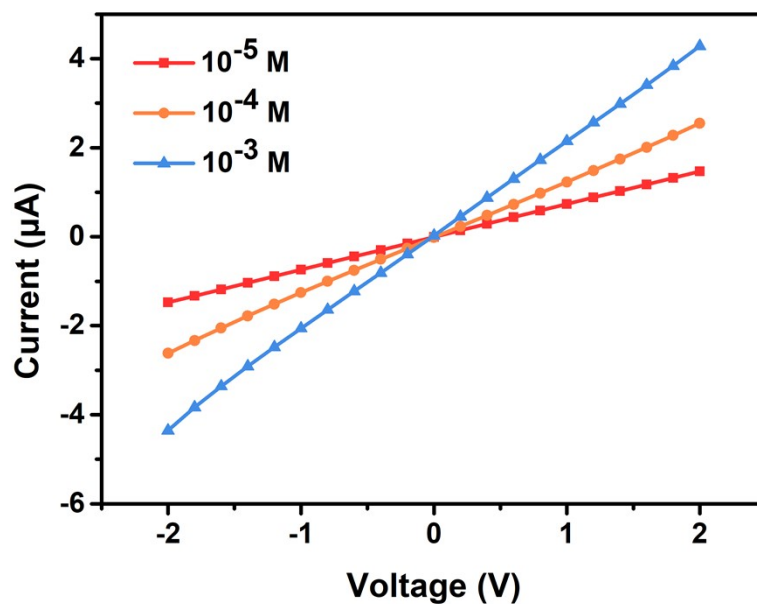

**Fig. S5** Current–voltage (I–V) curves of MXene/CMC membrane (CMC weight content of 20%) recorded in neutral KCl electrolyte with different concentrations.

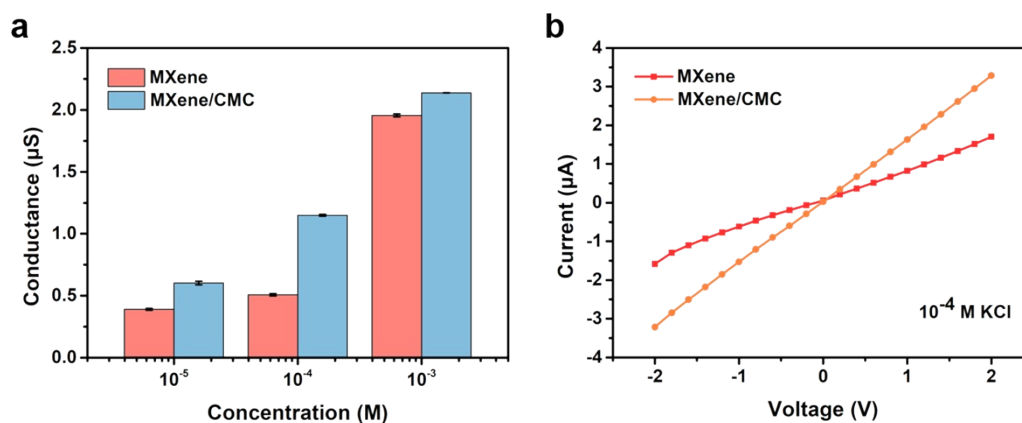

**Fig. S6** The variation of (a) conductance and (b) current–voltage (I–V) curves of different membranes.

### 3. Characterization of MXene/CMC with divalent metal ions

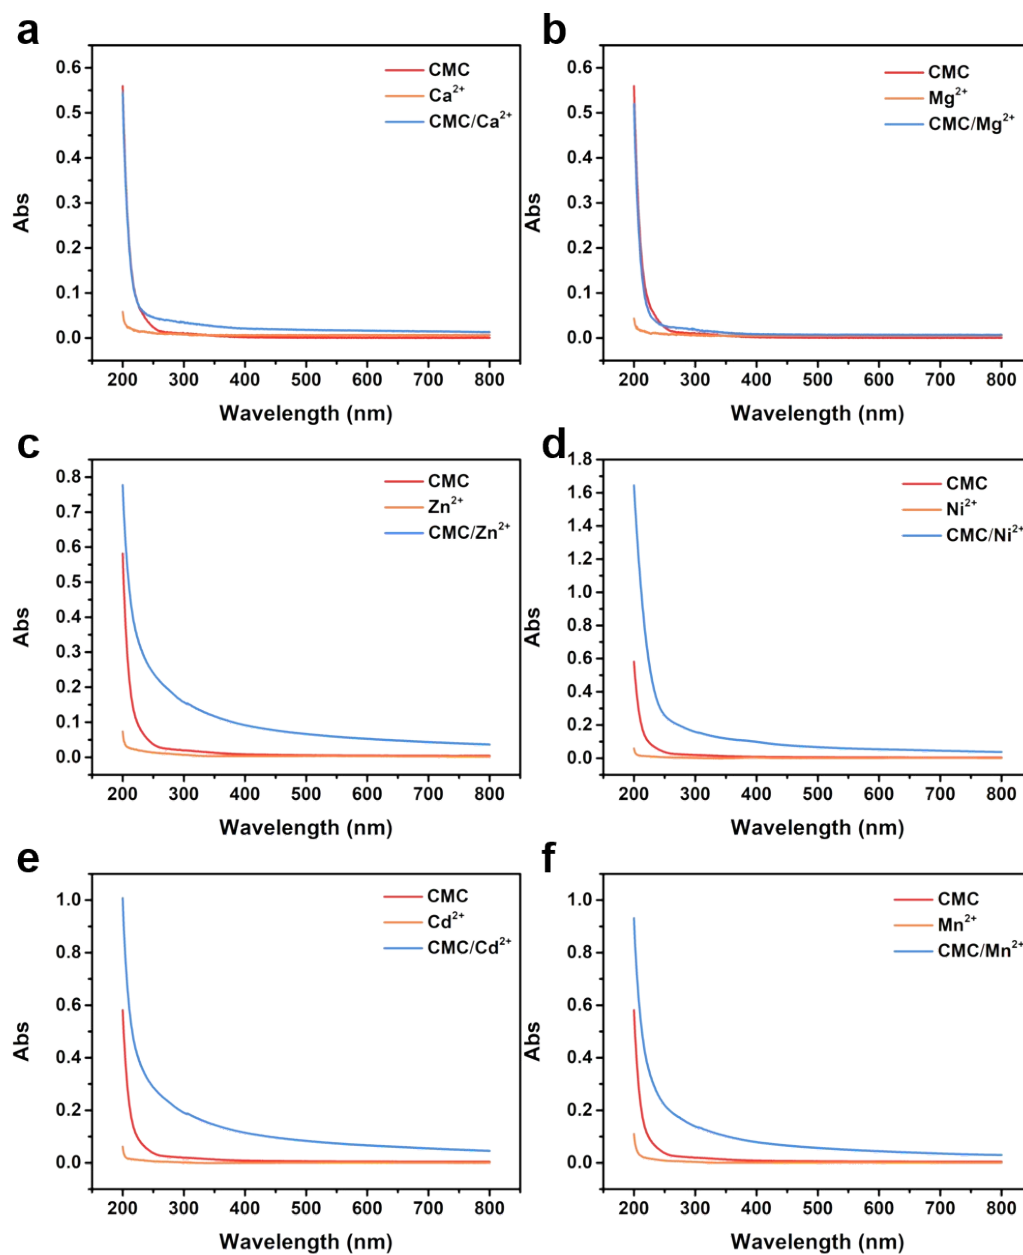

**Fig. S7** UV-Vis absorption spectra of CMC with different divalent metal ions (1 mM).

(a) Ca<sup>2+</sup>, (b) Mg<sup>2+</sup>, (c) Zn<sup>2+</sup>, (d) Ni<sup>2+</sup>, (e) Cd<sup>2+</sup> and (f) Mn<sup>2+</sup>.

#### 4. XPS spectrum of O 1s and N 1s of membranes

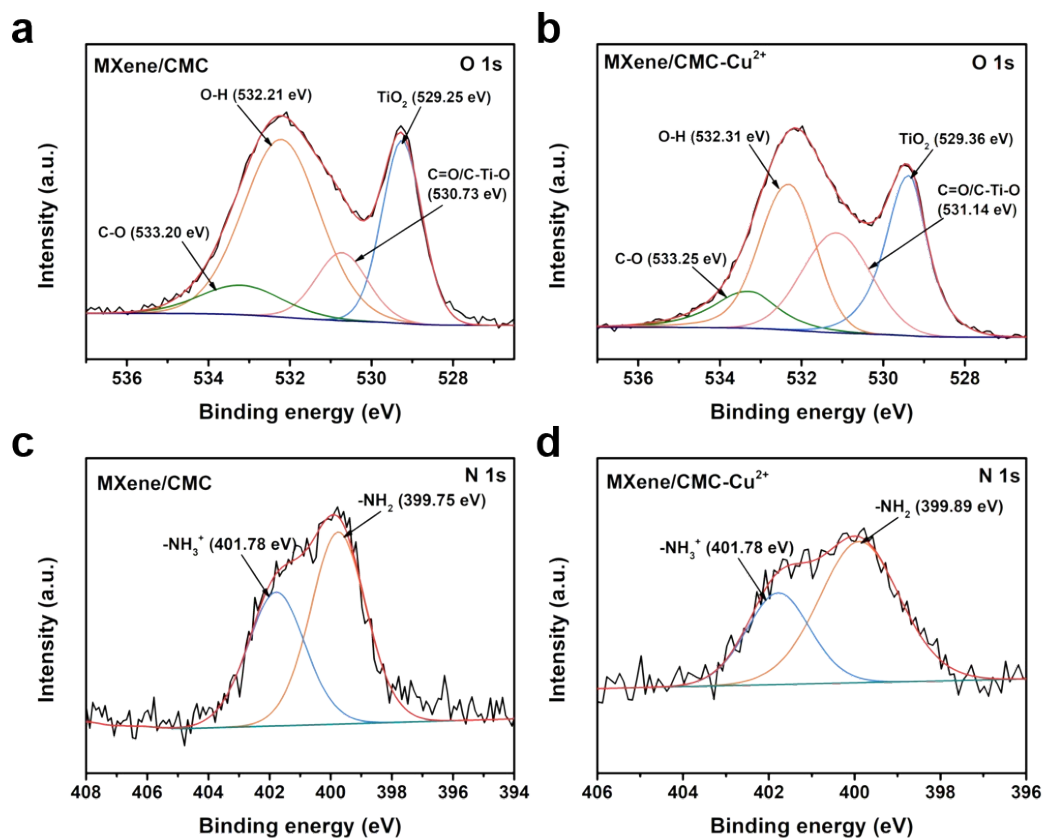

**Fig. S8** XPS spectrum of O 1s of (a) MXene/CMC and (b) MXene/CMC-Cu<sup>2+</sup>, respectively. XPS spectrum of N 1s of (c) MXene/CMC and (d) MXene/CMC-Cu<sup>2+</sup>, respectively.

## 5. Influence of CMC content on $\text{Cu}^{2+}$ detection

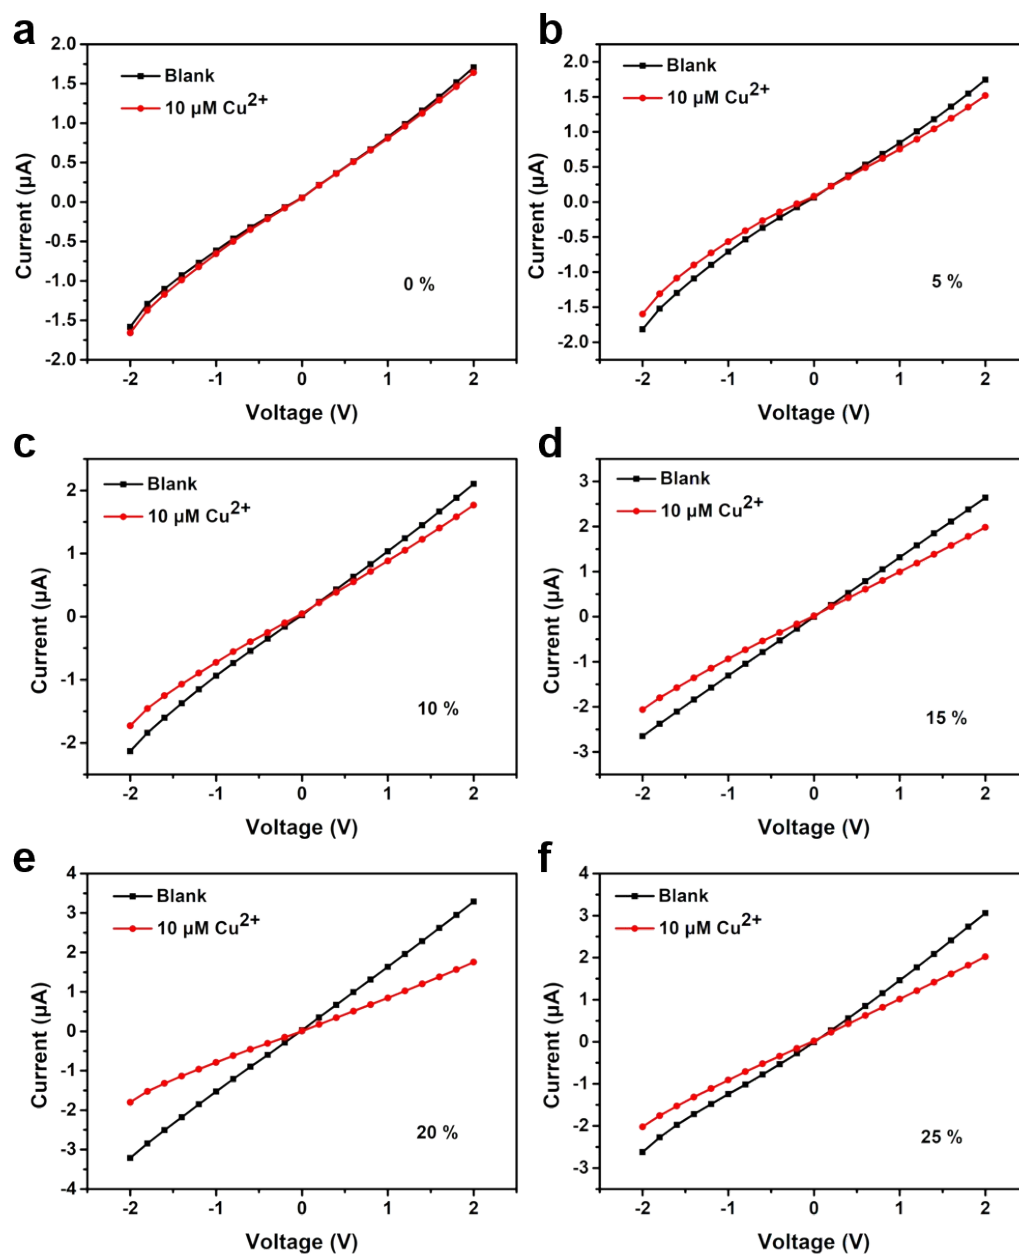

**Fig. S9** Influence of the CMC content of MXene/CMC membrane on  $\text{Cu}^{2+}$  detection.

(a) 0%, (b) 5%, (c) 10%, (d) 15%, (e) 20%, and (f) 25%.



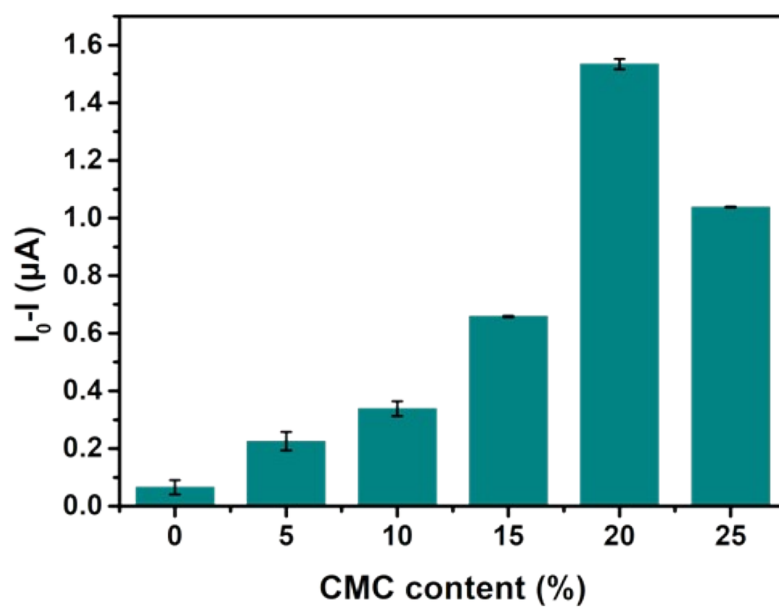

**Fig. S10** Influence of CMC contents on the current change of MXene/CMC with the absence and the presence of 10  $\mu\text{M}$   $\text{CuCl}_2$ .

## 6. I–V of MXene/CMC under different $\text{Cu}^{2+}$ concentrations

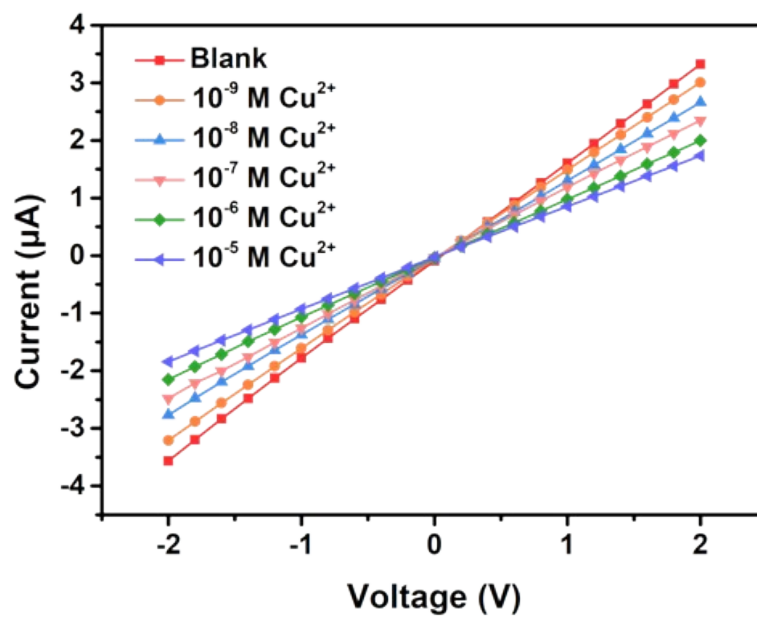

Fig. S11 I–V curves of MXene/CMC under different  $\text{Cu}^{2+}$  concentrations.

## 7. Zeta potential and water contact angles of nanochannels

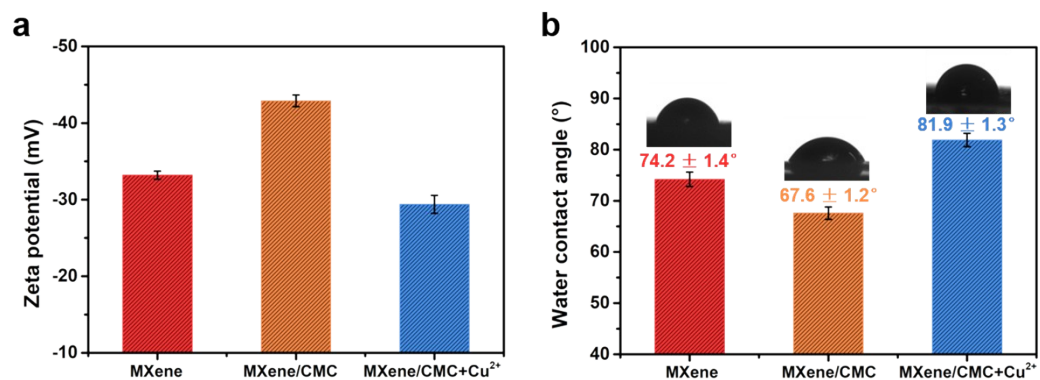

**Fig. S12** (a) Zeta potential of MXene, MXene/CMC and MXene/CMC with Cu<sup>2+</sup>. (b) Water contact angles of different nanochannels.

## 8. Detection of $\text{Cu}^{2+}$ in real samples

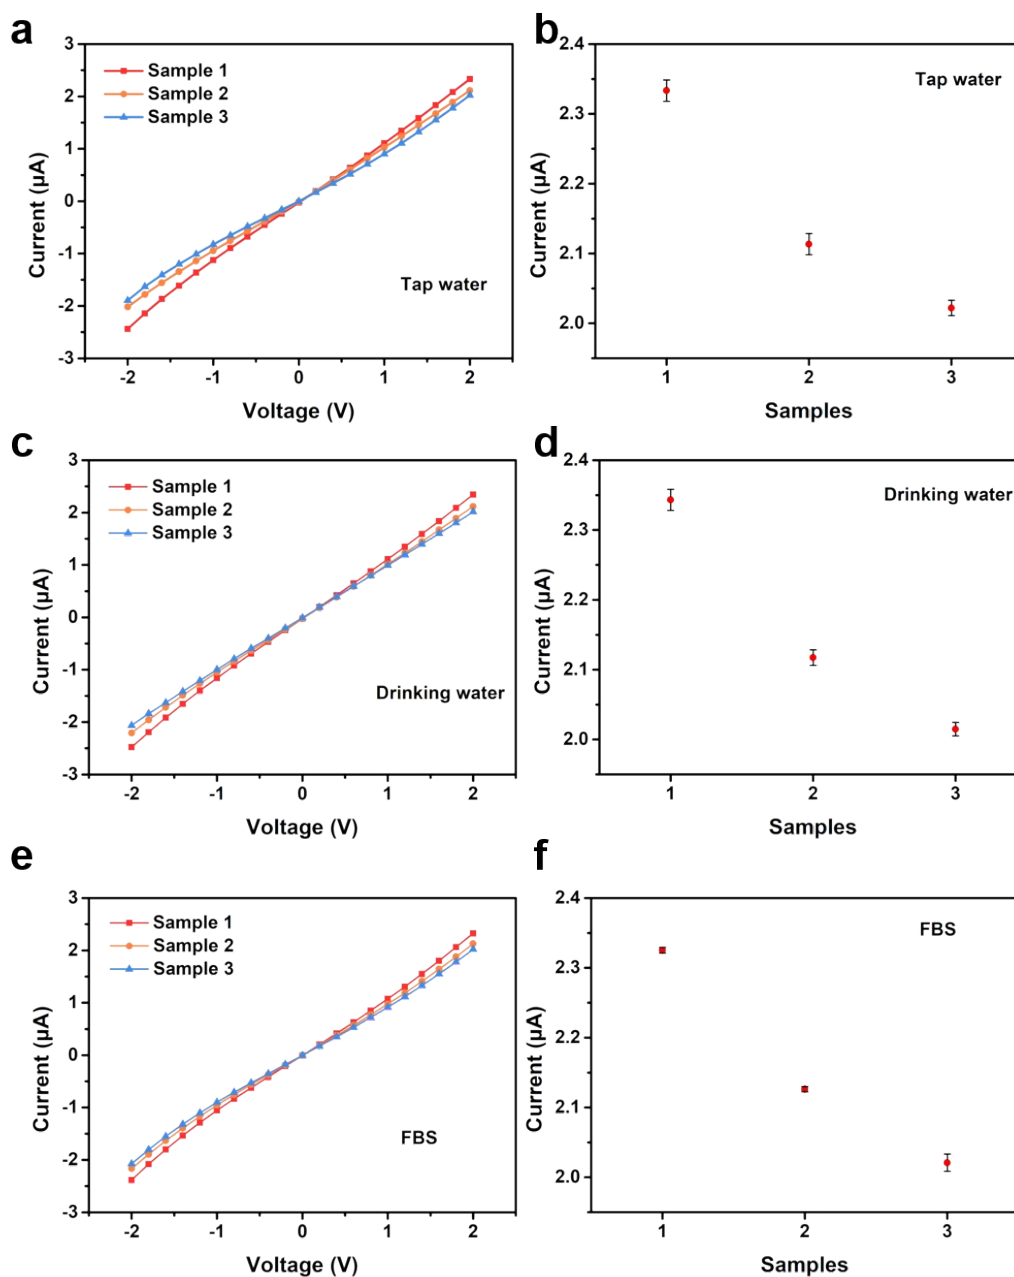

**Fig. S13** Detection of  $\text{Cu}^{2+}$  in real samples. I–V profiles of different concentrations of  $\text{Cu}^{2+}$  in tap water (a), drinking water (c) and FBS (e) samples. Sample 1:  $10 \mu\text{M}$   $\text{Cu}^{2+}$  added, sample 2:  $50 \mu\text{M}$   $\text{Cu}^{2+}$  added and sample 3:  $100 \mu\text{M}$   $\text{Cu}^{2+}$  added. (b, d and f) Ionic current at +2 V versus different samples.

## 9. The dosage of different MXene/CMC composite membrane

**Table S1.** The dosage of different MXene/CMC composite membrane.

| Items        | 0% | 5%  | 10% | 15% | 20% | 25% |
|--------------|----|-----|-----|-----|-----|-----|
| MXene (V/mL) | 10 | 10  | 10  | 10  | 10  | 10  |
| CMC (V/mL)   | 0  | 0.5 | 1   | 1.5 | 2   | 2.5 |

## 10. Comparison of some methods reported for Cu<sup>2+</sup> detection

**Table S2.** The sensing performance of different methods reported for Cu<sup>2+</sup> detection

| Materials                                         | Methods      | Linear range   | Detection limit | Ref.      |
|---------------------------------------------------|--------------|----------------|-----------------|-----------|
| Ti <sub>3</sub> C <sub>2</sub> T <sub>x</sub> @CB | DPV          | 0.01 - 15 μM   | 4.6 nM          | 2         |
| GA-UiO-66-NH <sub>2</sub>                         | DPSV         | 0.1 - 3.5 μM   | 7 nM            | 3         |
| ZIF-67/EG                                         | SWASV        | 0.5 - 3 μM     | 2.23 nM         | 4         |
| PLA/GR                                            | CV           | 0.08 - 1.6 mM  | 3.52 μM         | 5         |
| Ni/NiO/ZnO-6/CS                                   | DPV          | 0 - 6 μM       | 0.81 nM         | 6         |
| N-Ti <sub>3</sub> C <sub>2</sub> QDs              | Fluorescence | 50 nM - 1 mM   | 3 nM            | 7         |
| PEIFPLP NP                                        | Fluorescence | 2.4 - 19 μM    | 17 nM           | 8         |
| CdSe@ZIF-8/PAA                                    | Nanochannels | 0.01 pM - 1 μM | 4 fM            | 9         |
| MXene/CMC                                         | Nanochannels | 1 nM - 10 μM   | 0.095 nM        | This work |

## 11. Results of the detection of Cu<sup>2+</sup> in tap water, drinking water, and

### FBS samples

**Table S3.** Results of the detection of Cu<sup>2+</sup> in tap water, drinking water, and FBS samples

| Samples        | Added Cu <sup>2+</sup> ( $\mu$ M) | Found Cu <sup>2+</sup> ( $\mu$ M) | Recovery (%) | RSD (%) |
|----------------|-----------------------------------|-----------------------------------|--------------|---------|
| Tap water      | 10                                | 10.6                              | 106          | 4.09    |
|                | 50                                | 51.2                              | 102          | 4.07    |
|                | 100                               | 99                                | 99           | 1.67    |
| Drinking water | 10                                | 9.85                              | 98.5         | 3.98    |
|                | 50                                | 49.8                              | 99.7         | 3.57    |
|                | 100                               | 104                               | 104          | 3.42    |
| FBS            | 10                                | 11.2                              | 112          | 4.26    |
|                | 50                                | 46.7                              | 93.4         | 4.56    |
|                | 100                               | 99.4                              | 99.4         | 2.24    |

## 12.Supporting references

1. Z. Zhang, S. Yang, P. Zhang, J. Zhang, G. Chen and X. Feng, *Nat. Commun.*, 2019, **10**, 2920.
2. Y. Xia, Y. Ma, Y. Wu, Y. Yi, H. Lin and G. Zhu, *Microchim. Acta*, 2021, **188**, 377.
3. M. Lu, Y. Deng, Y. Luo, J. Lv, T. Li, J. Xu, S.-W. Chen and J. Wang, *Anal. Chem.*, 2019, **91**, 888-895.
4. L. Ma, X. Zhang, M. Ikram, M. Ullah, H. Wu and K. Shi, *Chem. Eng. J.*, 2020, **395**, 125216.
5. G. Chakraborty, V. Katiyar and G. Pugazhenthii, *Compos. Sci. Technol.*, 2021, **213**, 108877.
6. J. Yu, X. Zhang, M. Zhao, Y. Ding, Z. Li, Y. Ma, H. Li and H. Cui, *Anal. Chim. Acta*, 2021, **1143**, 45-52.
7. X. Zhou, J. Zhang, D. Huang, Y. Yi, K. Wu and G. Zhu, *Spectrochim. Acta. A*, 2023, **293**, 122484.
8. A. K. Saini and S. K. Sahoo, *ACS Appl. Nano Mater.*, 2023, **6**, 3277-3284.
9. H. Gao, R. Sun, L. He, Z.-J. Qian, C. Zhou, P. Hong, S. Sun, R. Mo and C. Li, *ACS Appl. Mater. Interfaces*, 2020, **12**, 4849-4858.
